# Supplementary material for: Normative Data of Ocular Biometry, Optical Coherence Tomography, and Electrophysiology Conducted for Cynomolgus Macaque Monkeys
Source: PubMed Central journal article supplement — Transl Vis Sci Technol. 2021 Nov 10;10(13):14. doi: 10.1167/tvst.10.13.14 (PMC8590181; doi:10.1167/tvst.10.13.14), 2021-11-10

## **Supplementary Figure S1. Optical coherence tomography measurement for cynomolgus monkeys**

Under general anesthesia, the examination is performed in the right lateral decubitus position. **A, B.** A representative 55° infrared image is presented. **C.** Enlarged images for the measurement of each sublayer thickness at the periphery are shown. The total retinal layer (TRL) is defined as the layer from the outer border of the internal limiting membrane (ILM) to the inner border of the retinal pigment epithelium. The ganglion cell layer (GCC) is defined as the layer from the inner border of the NFL to the inner border of the INL. The IRL is defined as the layer from the inner border of the ILM to the ellipsoid zone. ORL is defined as the layer from the ellipsoid zone to the outer border of the RPE layer. **D.** A representative figure for the 55° OCT on the vertical axis is presented. Peripheral thickness was measured 5-mm superior to the fovea and 5-mm inferior to the fovea. **E.** The automated measurement of the sublayer thickness of the four quadrants in the fovea, parafovea, and perifovea was used for analysis. **F.** The automated measurement of peripapillary retinal NFL thickness was evaluated after adjusting the axis (top left. The blue line in the machine in the program indicates the temporal side.

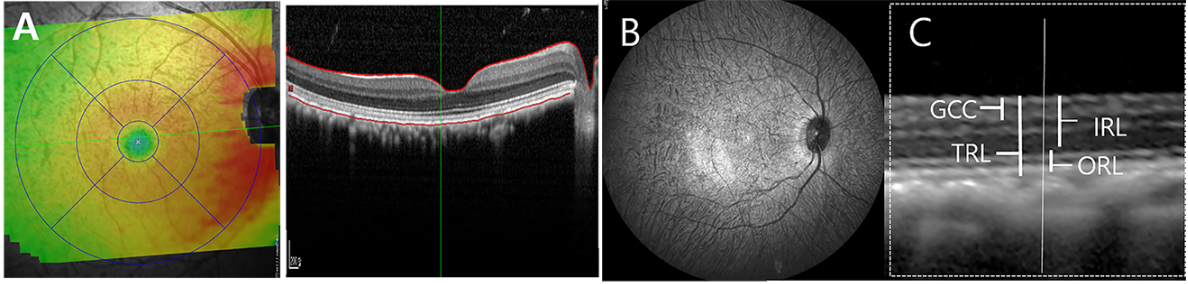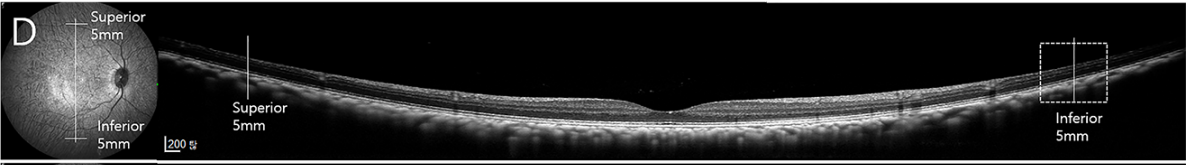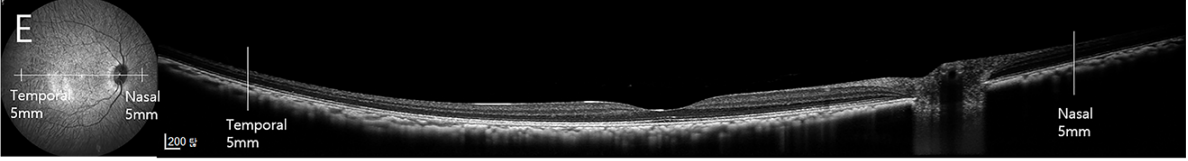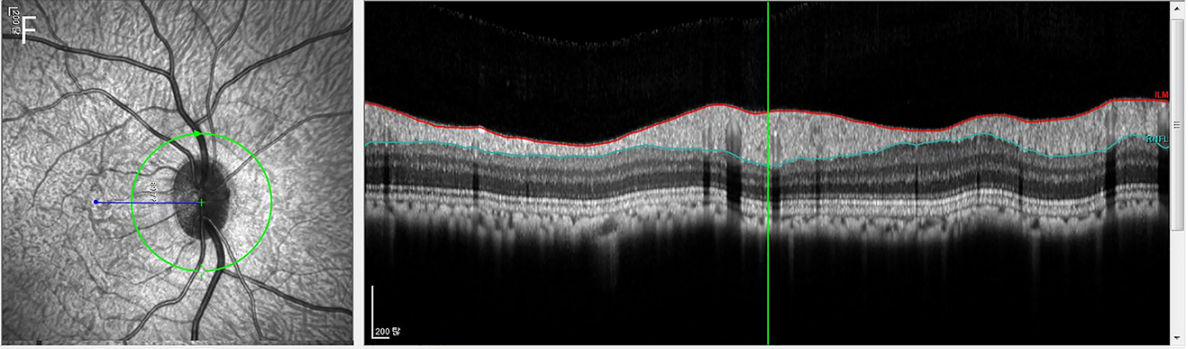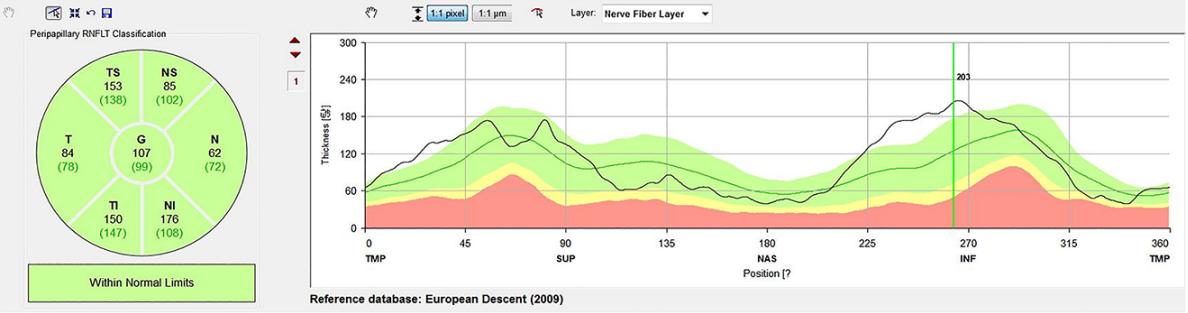

Supplement: tvst-10-13-14_s001.pdf [file tvst-10-13-14_s001.pdf]
