# Supplementary material for: Normative Data of Ocular Biometry, Optical Coherence Tomography, and Electrophysiology Conducted for Cynomolgus Macaque Monkeys
Source: PubMed Central journal article supplement — Transl Vis Sci Technol. 2021 Nov 10;10(13):14. doi: 10.1167/tvst.10.13.14 (PMC8590181; doi:10.1167/tvst.10.13.14), 2021-11-10

## Supplementary Figure S2. Correlations between electroretinogram (ERG), optical coherence tomography, and ocular biometry

**A-D.** Scatter plots using significant correlation factors by multiple logistic regression test are shown. The significant **A.** The axial length (AL) has significant positive correlations with vitreous chamber depth (VCD) ( $r = 0.796$ ,  $p = 0.003$ ) and anterior chamber depth (ACD) ( $r = 0.796$ ,  $p < 0.001$ ). **B.** The ACD has significant correlations with ganglion cell layer (GCC) thickness on the fovea ( $r = 0.599$ ,  $p = 0.003$ ), inner nuclear layer (INL) thickness on the fovea ( $r = 0.599$ ,  $p = 0.003$ ), and lens thickness (LT) ( $r = -0.504$ ,  $p = 0.017$ ). **C.** Peak latency of a-wave in scotopic 3.0 ERG has significant correlations with inner plexiform layer (IPL) thickness on the fovea ( $p = 0.451$ ,  $p=0.035$ ), body weight (BW) ( $r = 0.575$ ,  $p = 0.005$ ), and age ( $r = 0.610$ ,  $p = 0.003$ ). **D.** Peak latency of a-wave in photopic 3.0 ERG has significant correlations with outer retinal layer (ORL) thickness on the perifovea ( $p = -0.440$ ,  $p = 0.040$ ), retinal pigment epithelium (RPE) thickness on the perifovea ( $r = -0.555$ ,  $p = 0.007$ ), and age ( $r = 0.464$ ,  $p = 0.029$ ).

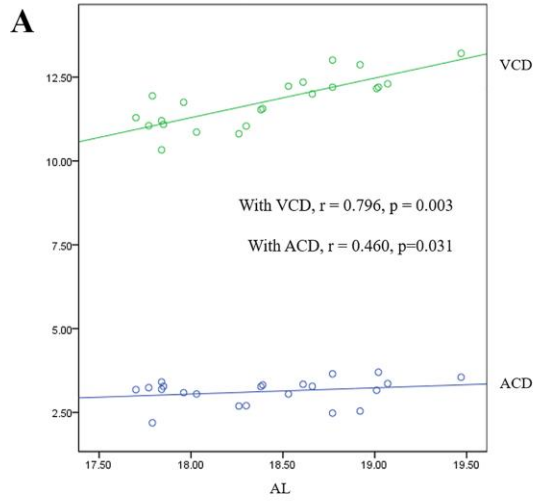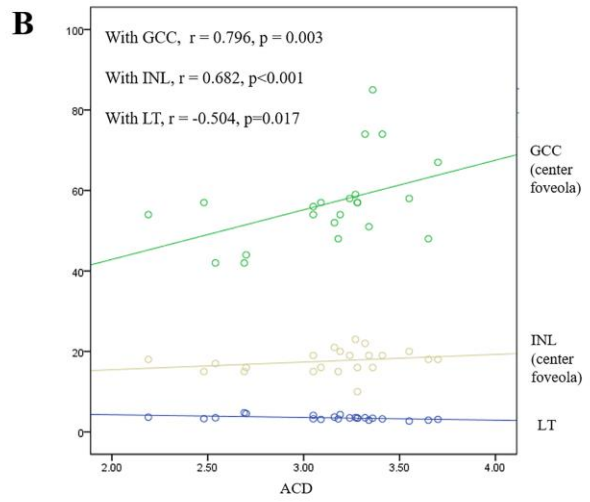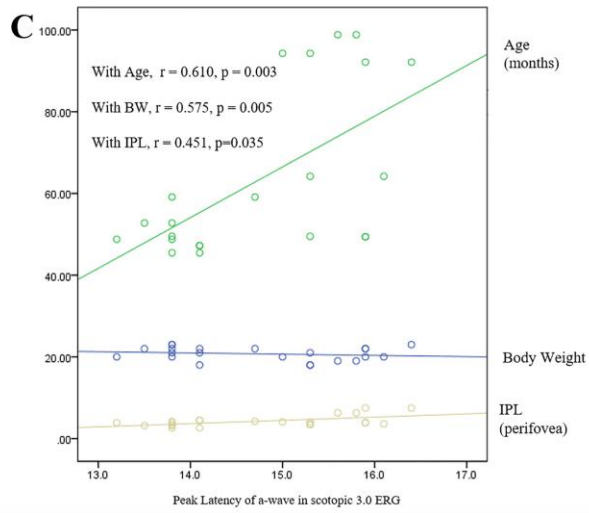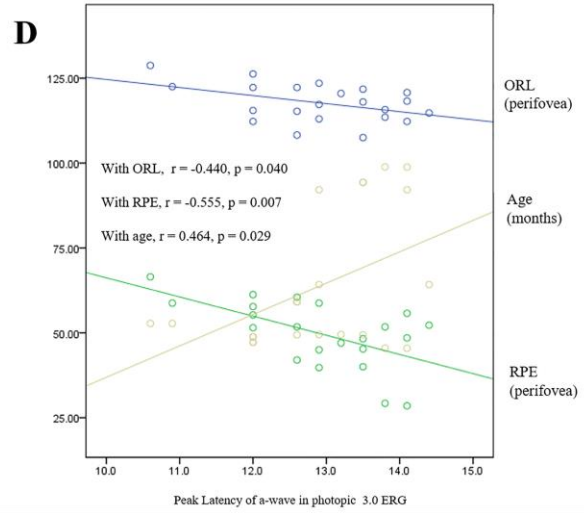

Supplement: tvst-10-13-14_s002.pdf [file tvst-10-13-14_s002.pdf]
