# Supplementary material for: Normative Data of Ocular Biometry, Optical Coherence Tomography, and Electrophysiology Conducted for Cynomolgus Macaque Monkeys
Source: PubMed Central journal article supplement — Transl Vis Sci Technol. 2021 Nov 10;10(13):14. doi: 10.1167/tvst.10.13.14 (PMC8590181; doi:10.1167/tvst.10.13.14), 2021-11-10

**Supplementary Figure S3. Representative case of electroretinogram (ERG) and flash visual evoked potentials (VEP) measurement for a cynomolgus monkey.**

**A–G.** The left image shows the right eye, and the right image shows the left eye in monkey #3. All representative data are presented for the right eye (left image). **A.** A scotopic 0.01 ERG showing the mean peak latency and amplitudes of b-wave (80.7 ms and 92.5  $\mu$ V). **B.** A scotopic 3.0 ERG showing the peak latency of the a-wave and b-wave (15.3 and 32.9 ms, respectively). The amplitudes of the a-wave and b-wave are 88.7 and 123.0  $\mu$ V, respectively. **C.** A scotopic 10.0 ERG showing the peak latency of the a-wave and b-wave (14.1 and 31.1 ms, respectively). The amplitudes of the a-wave and b-wave are 81.7 and 91.2  $\mu$ V, respectively. **D.** The oscillatory potential with an amplitude of 51.1  $\mu$ V. **E.** A photopic 3.0 ERG showing the mean peak latency of the a-wave and b-wave (13.5 and 32.3 ms, respectively). The mean amplitudes of the a-wave and b-wave are 30.0 and 102.0  $\mu$ V, respectively. **F.** A 30-Hz flicker ERG with an amplitude of 104  $\mu$ V. **G.** The flash VEP for Monkey #3 is presented. The peak latencies of the p1-wave, n2-wave, and p-2 waves were 17.6, 40.1, and 80.2 ms, respectively.

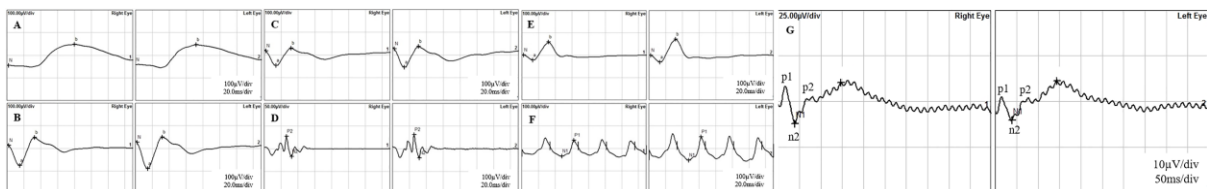

Supplement: tvst-10-13-14_s003.pdf [file tvst-10-13-14_s003.pdf]
