# Supplementary material for: Normative Data of Ocular Biometry, Optical Coherence Tomography, and Electrophysiology Conducted for Cynomolgus Macaque Monkeys
Source: PubMed Central journal article supplement — Transl Vis Sci Technol. 2021 Nov 10;10(13):14. doi: 10.1167/tvst.10.13.14 (PMC8590181; doi:10.1167/tvst.10.13.14), 2021-11-10

**Supplementary Figure S4. Correlations between age and electrophysiology test including electroretinogram (ERG) and flash visual evoked potentials (VEP)**

**A-F.** Scatter plots using significant correlation factors of electrophysiology test with age by Pearson correlation analysis are shown. **A.** Peak latency of a-wave in scotopic 3.0 ERG has a positive linear correlation with age ( $r = 0.610$ ,  $p = 0.003$ ). **B.** Peak latency of a-wave in photopic 3.0 ERG has a positive linear correlation with age ( $r = 0.466$ ,  $p = 0.029$ ). **C.** Peak latency of n2-wave in flash VEP has a negative linear correlation with age ( $r = -0.444$ ,  $p = 0.039$ ). **D.** Amplitude of n2-wave in flash VEP has a negative linear correlation with age ( $r = -0.551$ ,  $p = 0.008$ ). **E.** Amplitude of p2-wave in flash VEP has a negative linear correlation with age ( $r = -0.708$ ,  $p < 0.001$ ). **F.** Amplitude of n4-wave in flash VEP has a negative linear correlation with age ( $r = -0.518$ ,  $p = 0.013$ ).

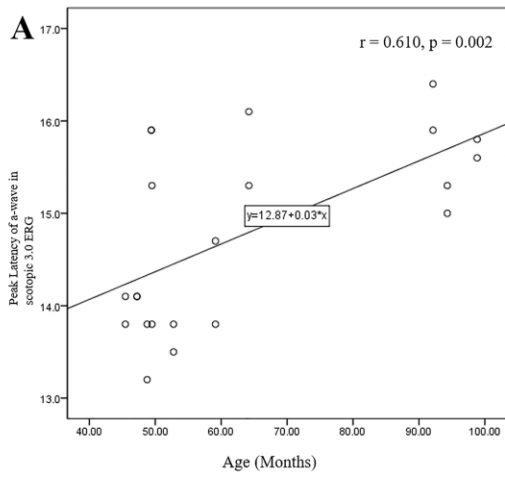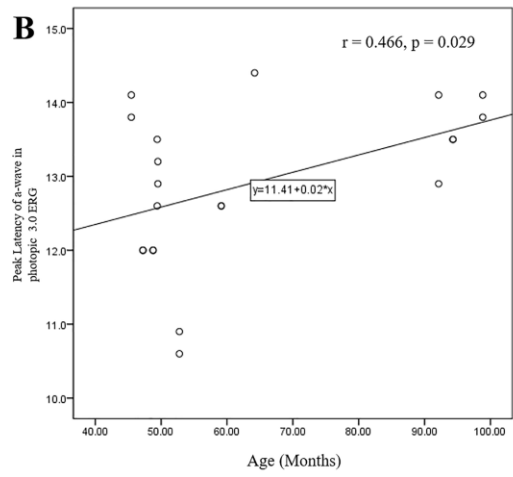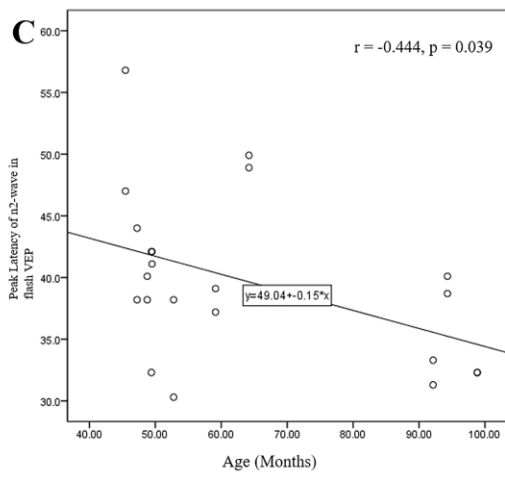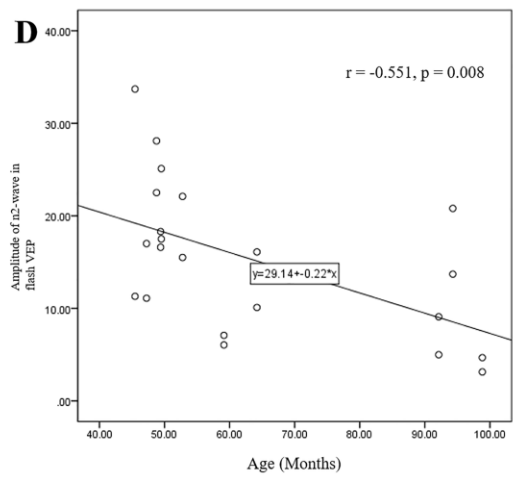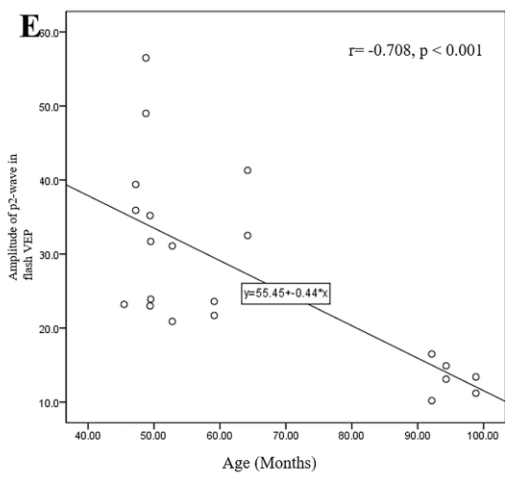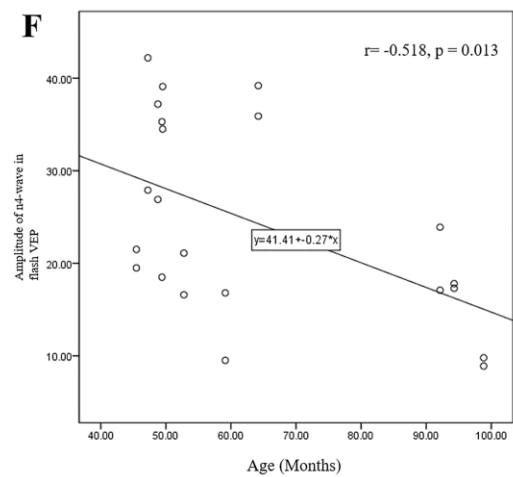

Supplement: tvst-10-13-14_s004.pdf [file tvst-10-13-14_s004.pdf]
