# Supplementary material for: Normative Data of Ocular Biometry, Optical Coherence Tomography, and Electrophysiology Conducted for Cynomolgus Macaque Monkeys
Source: PubMed Central journal article supplement — Transl Vis Sci Technol. 2021 Nov 10;10(13):14. doi: 10.1167/tvst.10.13.14 (PMC8590181; doi:10.1167/tvst.10.13.14), 2021-11-10
Supplement: tvst-10-13-14_s005.pdf [file tvst-10-13-14_s005.pdf]

1 **Supplementary Table S1. Thicknesses of the fovea, perifovea, parafovea, and**  
 2 **peripheral retina outside the vascular arcade in cynomolgus monkeys using optical**  
 3 **coherence tomography**

|                                                      | <b>Left</b>  | <b>Right</b> | <b>Both</b>  | <b>p-value</b> |
|------------------------------------------------------|--------------|--------------|--------------|----------------|
| <b>Central subfoveal choroidal thickness</b>         | 233.18±54.29 | 236.27±56.16 | 234.73±53.93 | 0.897          |
| <b>Total retinal thickness – center</b>              | 285.27±21.17 | 287.28±16.21 | 286.27±18.43 | 0.806          |
| <b>Total retinal thickness (superior, 3 mm zone)</b> | 353.82±13.12 | 351.18±23.94 | 352.50±18.89 | 0.752          |
| <b>Mean TRL thickness (inferior, 3 mm zone)</b>      | 357.27±9.42  | 355.45±14.58 | 356.36±12.01 | 0.732          |
| <b>Mean TRL thickness (nasal, 3 mm zone)</b>         | 363.09±8.04  | 360.55±18.06 | 361.82±13.70 | 0.674          |
| <b>Mean TRL thickness (temporal, 3 mm zone)</b>      | 347.27±11.41 | 350.73±8.46  | 349.00±9.96  | 0.429          |
| <b>Mean TRL thickness (superior, 6 mm zone)</b>      | 329.45±14.35 | 320.73±18.24 | 325.09±16363 | 0.227          |
| <b>Mean TRL thickness (inferior, 6 mm zone)</b>      | 344.82±10.96 | 354.00±15.29 | 349.41±13.81 | 0.121          |
| <b>Mean TRL thickness (nasal, 6 mm zone)</b>         | 377.82±13.68 | 368.09±21.67 | 372.95±18.37 | 0.223          |
| <b>Total retinal thickness (temporal, 6 mm zone)</b> | 313.09±11.90 | 309.36±15.28 | 311.23±13.50 | 0.531          |

|                                                 |              |              |              |       |
|-------------------------------------------------|--------------|--------------|--------------|-------|
| <b>Mean ppRNFL thickness (center)</b>           | 99.09±6.07   | 100.55±6.98  | 99.82±6.43   | 0.592 |
| <b>Mean ppRNFL thickness (temporal)</b>         | 73.73±8.95   | 74.55±11.09  | 74.14±9.84   | 0.824 |
| <b>Mean ppRNFL thickness (inferotemporal)</b>   | 126.09±16.73 | 144.09±20.31 | 135.09±20.36 | 0.014 |
| <b>Mean ppRNFL thickness (superotemporal)</b>   | 120.55±1.26  | 126.36±18.98 | 123.45±25.41 | 0.790 |
| <b>Mean ppRNFL thickness (nasal)</b>            | 60.73±13.15  | 67.36±10.75  | 64.05±12.20  | 0.014 |
| <b>Mean ppRNFL thickness (inferonasal)</b>      | 111.73±35.51 | 115.00±25.45 | 113.36±30.19 | 0.756 |
| <b>Mean ppRNFL thickness (superonasal)</b>      | 95.55±17.03  | 114.18±23.95 | 104.86±22.41 | 0.062 |
| <b>Mean IRL thickness (center)</b>              | 176.45±16.28 | 177.36±12.77 | 176.91±14.28 | 0.886 |
| <b>Mean IRL thickness (superior, 3 mm zone)</b> | 244.55±9.72  | 239.64±18.44 | 242.09±14.60 | 0.444 |
| <b>Mean IRL thickness (inferior, 3 mm zone)</b> | 246.55±11.93 | 237.09±5.79  | 241.82±33.01 | 0.515 |
| <b>Mean IRL thickness (nasal, 3 mm zone)</b>    | 251.45±10.75 | 249.82±19.60 | 250.64±15.45 | 0.811 |
| <b>Mean IRL thickness (temporal, 3 mm zone)</b> | 235.36±9.11  | 230.36±26.75 | 232.86±19.67 | 0.564 |
| <b>Mean IRL thickness (superior, 6 mm zone)</b> | 213.82±16.91 | 186.64±56.08 | 200.23±42.75 | 0.139 |
| <b>Mean IRL thickness (inferior, 6 mm zone)</b> | 226.36±11.52 | 238.73±15.66 | 232.55±14.83 | 0.058 |

|                                                 |              |              |              |       |
|-------------------------------------------------|--------------|--------------|--------------|-------|
| <b>Mean IRL thickness (nasal, 6 mm zone)</b>    | 259.36±11.01 | 250.91±18.34 | 255.14±15.38 | 0.205 |
| <b>Mean IRL thickness (temporal, 6 mm zone)</b> | 191.36±12.09 | 194.45±19.59 | 192.91±15.96 | 0.661 |
| <b>Mean ORL thickness (center)</b>              | 102.82±34.01 | 109.91±5.57  | 106.36±26.07 | 0.537 |
| <b>Mean ORL thickness (superior, 3 mm zone)</b> | 109.36±14.02 | 111.45±10.43 | 110.41±12.10 | 0.696 |
| <b>Mean ORL thickness (inferior, 3 mm zone)</b> | 111.45±12.11 | 109.18±12.93 | 110.32±12.28 | 0.675 |
| <b>Mean ORL thickness (nasal, 3 mm zone)</b>    | 111.55±13.10 | 110.18±8.01  | 110.86±10.62 | 0.771 |
| <b>Mean ORL thickness (temporal, 3 mm zone)</b> | 111.73±13.82 | 111.27±9.49  | 111.50±11.58 | 0.929 |
| <b>Mean ORL thickness (superior, 6 mm zone)</b> | 115.82±8.76  | 117.45±.14   | 116.64±7.43  | 0.617 |
| <b>Mean ORL thickness (inferior, 6 mm zone)</b> | 118.73±6.33  | 115.36±4.37  | 117.05±5.58  | 0.162 |
| <b>Mean ORL thickness (nasal, 6 mm zone)</b>    | 118.55±9.73  | 117.18±7.09  | 117.86±8.34  | 0.711 |
| <b>Mean ORL thickness (temporal, 6 mm zone)</b> | 121.73±8.49  | 117.00±8.36  | 119.36±8.57  | 0.203 |
| <b>Mean GCC thickness (center)</b>              | 58.09±13.91  | 55.36±6.01   | 56.73±10.55  | 0.557 |
| <b>Mean GCC thickness (superior, 3 mm zone)</b> | 107.09±6.76  | 102.91±15.93 | 105.00±12.13 | 0.432 |

|                                                 |              |              |              |       |
|-------------------------------------------------|--------------|--------------|--------------|-------|
| <b>Mean GCC thickness (inferior, 3 mm zone)</b> | 109.18±7.71  | 109.45±5.92  | 109.32±12.21 | 0.90  |
| <b>Mean GCC thickness (nasal, 3 mm zone)</b>    | 103.36±12.31 | 104.27±12.39 | 103.82±12.07 | .865  |
| <b>Mean GCC thickness (temporal, 3 mm zone)</b> | 96.82±5.06   | 94.45±13.43  | 95.64±9.97   | 0.591 |
| <b>Mean GCC thickness (superior, 6 mm zone)</b> | 100.91±11.84 | 92.55±9.94   | 96.73±11.49  | 0.088 |
| <b>Mean GCC thickness (inferior, 6 mm zone)</b> | 114.18±10.02 | 124.55±3.18  | 119.36±12.59 | 0.051 |
| <b>Mean GCC thickness (nasal, 6 mm zone)</b>    | 135.55±1.36  | 138.73±13.99 | 137.14±12.54 | 0.565 |
| <b>Mean GCC thickness (temporal, 6 mm zone)</b> | 76.64±8.36   | 75.64±5.45   | 76.14±6390   | 0.743 |
| <b>Mean NFL thickness (center)</b>              | 12.73±1.49   | 12.45±1.44   | 12.59±1.44   | 0.667 |
| <b>Mean NFL thickness (superior, 3 mm zone)</b> | 25.36±2.29   | 23.27±30.7   | 24.32±2.85   | 0.085 |
| <b>Mean NFL thickness (inferior, 3 mm zone)</b> | 27.27±2.69   | 25.45±4.61   | 26.36±3.79   | 0.272 |
| <b>Mean NFL thickness (nasal, 3 mm zone)</b>    | 21.64±1.21   | 21.45±2.69   | 21.55±2.04   | 0.840 |
| <b>Mean NFL thickness (temporal, 3 mm zone)</b> | 18.09±1.22   | 18.45±0.69   | 18.27±0.98   | 0.400 |
| <b>Mean NFL thickness (superior, 6 mm zone)</b> | 50.00±10.81  | 45.00±9.17   | 45.00±11.04  | 0.060 |

|                                                 |            |             |             |       |
|-------------------------------------------------|------------|-------------|-------------|-------|
| <b>Mean NFL thickness (inferior, 6 mm zone)</b> | 58.73±9.56 | 61.73±9.96  | 62.73±10.37 | 0.069 |
| <b>Mean NFL thickness (nasal, 6 mm zone)</b>    | 78.55±8.90 | 72.09±11.89 | 75.32±10.77 | 0.165 |
| <b>Mean NFL thickness (temporal, 6 mm zone)</b> | 20.73±1.74 | 21.36±2.73  | 21.05±2.26  | 0.522 |
| <b>Mean GCL thickness – center</b>              | 14.18±1.78 | 14.18±2.14  | 14.18±1.92  | 0.247 |
| <b>Mean GCL thickness (superior, 3 mm zone)</b> | 45.36±2.06 | 44.91±5.50  | 45.14±4.06  | 0.369 |
| <b>Mean GCL thickness (inferior, 3 mm zone)</b> | 45.73±2.69 | 43.91±9.82  | 44.82±7.09  | 1.000 |
| <b>Mean GCL thickness (nasal, 3 mm zone)</b>    | 47.18±2.04 | 46.36±4.63  | 46.77±3.52  | 0.800 |
| <b>Mean GCL thickness (temporal, 3 mm zone)</b> | 41.91±2.47 | 41.91±6.35  | 41.91±4.70  | 0.560 |
| <b>Mean GCL thickness (superior, 6 mm zone)</b> | 29.55±1.44 | 29.00±2.05  | 29.27±1.75  | 0.598 |
| <b>Mean GCL thickness (inferior, 6 mm zone)</b> | 31.45±1.92 | 32.64±2.73  | 32.05±2.38  | 1.000 |
| <b>Mean GCL thickness (nasal, 6 mm zone)</b>    | 34.82±2.27 | 34.27±3.17  | 34.55±2.70  | 0.478 |
| <b>Mean GCL thickness (temporal, 6 mm zone)</b> | 28.64±2.38 | 29.64±3.78  | 29.14±3.12  | 0.254 |
| <b>Mean IPL thickness – center</b>              | 20.82±1.83 | 20.64±1.50  | 20.73±1.64  | 0.647 |

|                                                 |            |            |            |       |
|-------------------------------------------------|------------|------------|------------|-------|
| <b>Mean IPL thickness (superior, 3 mm zone)</b> | 37.73±2.24 | 36.73±3.10 | 37.23±2.69 | 0.466 |
| <b>Mean IPL thickness (inferior, 3 mm zone)</b> | 38.00±2.19 | 36.64±7.38 | 37.32±5.36 | 0.702 |
| <b>Mean IPL thickness (nasal, 3 mm zone)</b>    | 39.73±1.79 | 39.27±3.52 | 39.50±2.74 | 0.740 |
| <b>Mean IPL thickness (temporal, 3 mm zone)</b> | 38.36±1.57 | 37.36±4.63 | 37.86±3.41 | 0.802 |
| <b>Mean IPL thickness (superior, 6 mm zone)</b> | 23.27±1.56 | 23.00±2.00 | 23.14±1.75 | 0.396 |
| <b>Mean IPL thickness (inferior, 6 mm zone)</b> | 25.18±1.47 | 26.00±2.19 | 25.59±1.87 | 0.563 |
| <b>Mean IPL thickness (nasal, 6 mm zone)</b>    | 27.64±1.63 | 27.82±2.36 | 27.73±1.98 | 0.707 |
| <b>Mean IPL thickness (temporal, 6 mm zone)</b> | 26.91±1.81 | 26.45±1.86 | 26.68±1.81 | 0.505 |
| <b>Mean INL thickness – center</b>              | 17.82±2.23 | 17.36±3.53 | 17.59±2.89 | 0.722 |
| <b>Mean INL thickness (superior, 3 mm zone)</b> | 40.27±4.34 | 39.00±5.18 | 39.64±4.71 | 0.539 |
| <b>Mean INL thickness (inferior, 3 mm zone)</b> | 39.73±3.82 | 38.00±9.14 | 38.86±6.89 | 0.570 |
| <b>Mean INL thickness (nasal, 3 mm zone)</b>    | 40.64±3.29 | 40.36±4.46 | 40.50±3.83 | 0.872 |
| <b>Mean INL thickness (temporal, 3 mm zone)</b> | 38.73±3.32 | 37.45±5.69 | 38.09±4.59 | 0.529 |

|                                                 |            |            |            |       |
|-------------------------------------------------|------------|------------|------------|-------|
| <b>Mean INL thickness (superior, 6 mm zone)</b> | 27.82±1.66 | 27.91±1.81 | 27.86±1.69 | 0.904 |
| <b>Mean INL thickness (inferior, 6 mm zone)</b> | 31.82±2.36 | 32.91±2.74 | 32.36±2.56 | 0.329 |
| <b>Mean INL thickness (nasal, 6 mm zone)</b>    | 36.64±1.96 | 35.73±1.74 | 36.81±1.87 | 0.264 |
| <b>Mean INL thickness (temporal, 6 mm zone)</b> | 32.18±1.72 | 32.64±2.62 | 32.41±2.18 | 0.636 |
| <b>Mean OPL thickness – center</b>              | 23.18±2.99 | 22.82±2.93 | 23.00±2.89 | 0.576 |
| <b>Mean OPL thickness (superior, 3 mm zone)</b> | 28.91±4.46 | 26.45±3.17 | 27.68±3.98 | 0.153 |
| <b>Mean OPL thickness (inferior, 3 mm zone)</b> | 26.82±2.09 | 27.36±7.34 | 27.09±5.27 | 0.815 |
| <b>Mean OPL thickness (nasal, 3 mm zone)</b>    | 28.18±1.66 | 27.00±2.41 | 27.59±2.11 | 0.195 |
| <b>Mean OPL thickness (temporal, 3 mm zone)</b> | 27.45±2.07 | 27.64±4.55 | 27.55±3.45 | 0.905 |
| <b>Mean OPL thickness (superior, 6 mm zone)</b> | 23.82±1.66 | 23.18±1.78 | 23.50±1.71 | 0.396 |
| <b>Mean OPL thickness (inferior, 6 mm zone)</b> | 23.09±0.94 | 23.73±2.05 | 23.41±1.05 | 0.162 |
| <b>Mean OPL thickness (nasal, 6 mm zone)</b>    | 24.18±0.75 | 23.82±1.47 | 24.00±1.16 | 0.474 |
| <b>Mean OPL thickness (temporal, 6 mm zone)</b> | 24.00±0.78 | 23.73±2.05 | 23.86±1.52 | 0.685 |

|                                                 |             |             |             |       |
|-------------------------------------------------|-------------|-------------|-------------|-------|
| <b>Mean ONL thickness – center</b>              | 89.09±12.19 | 87.36±14.69 | 88.23±13.21 | 0.767 |
| <b>Mean ONL thickness (superior, 3 mm zone)</b> | 66.55±10.62 | 69.00±8.23  | 67.77±9.36  | 0.551 |
| <b>Mean ONL thickness (inferior, 3 mm zone)</b> | 68.91±5.96  | 66.55±13.26 | 67.73±10.11 | 0.596 |
| <b>Mean ONL thickness (nasal, 3 mm zone)</b>    | 73.27±7.38  | 75.82±7.19  | 74.55±7.23  | 0.422 |
| <b>Mean ONL thickness (temporal, 3 mm zone)</b> | 70.09±8.38  | 68.18±7.18  | 69.14±7.68  | 0.573 |
| <b>Mean ONL thickness (superior, 6 mm zone)</b> | 59.09±6.41  | 60.36±5.89  | 59.73±6.04  | 0.633 |
| <b>Mean ONL thickness (inferior, 6 mm zone)</b> | 56.00±6.48  | 56.73±5.57  | 56.36±5.91  | 0.781 |
| <b>Mean ONL thickness (nasal, 6 mm zone)</b>    | 57.45±4.66  | 58.27±7.38  | 57.86±6.03  | 0.759 |
| <b>Mean ONL thickness (temporal, 6 mm zone)</b> | 59.18±5.94  | 57.36±4.11  | 58.27±6.85  | 0.547 |
| <b>Mean RPE thickness – center</b>              | 43.27±16.18 | 38.82±17.42 | 41.05±16.57 | 0.541 |
| <b>Mean RPE thickness (superior, 3 mm zone)</b> | 41.00±15.05 | 44.00±12.72 | 42.50±13.69 | 0.619 |
| <b>Mean RPE thickness (inferior, 3 mm zone)</b> | 43.73±14.00 | 40.45±14.21 | 42.09±13.87 | 0.592 |
| <b>Mean RPE thickness (nasal, 3 mm zone)</b>    | 44.55±13.13 | 41.36±9.87  | 42.95±11.45 | 0.528 |



|                                                 |              |              |              |       |
|-------------------------------------------------|--------------|--------------|--------------|-------|
| <b>Mean RPE thickness (temporal, 3 mm zone)</b> | 42.36±16.79  | 40.45±13.29  | 41.41±14.82  | 0.771 |
| <b>Mean RPE thickness (superior, 6 mm zone)</b> | 48.27±12.08  | 50.27±8.81   | 49.27±10.37  | 0.662 |
| <b>Mean RPE thickness (inferior, 6 mm zone)</b> | 50.09±11.46  | 47.36±9.27   | 48.73±10.26  | 0.546 |
| <b>Mean RPE thickness (nasal, 6 mm zone)</b>    | 52.00±11.31  | 50.36±9.42   | 51.18±10.19  | 0.716 |
| <b>Mean RPE thickness (temporal, 6 mm zone)</b> | 51.55±16.07  | 48.36±13.57  | 49.95±14.60  | 0.621 |
| <b>Mean TRL thickness (superior, 5 mm)</b>      | 224.64±11.31 | 221.36±10.61 | 223.00±10.83 | 0.540 |
| <b>Mean TRL thickness (inferior, 5 mm)</b>      | 232.54±13.66 | 230.46±14.06 | 231.50±13.57 | 0.789 |
| <b>Mean TRL thickness (nasal, 5 mm)</b>         | 234.36±12.95 | 233.46±17.01 | 233.91±14.76 | 0.929 |
| <b>Mean TRL thickness (temporal, 5 mm)</b>      | 189.73±16.54 | 197.82±12.12 | 193.77±14.75 | 0.154 |
| <b>Mean IRL thickness (superior, 5 mm)</b>      | 151.55±8.12  | 151.73±10.55 | 151.64±9.18  | 0.929 |
| <b>Mean IRL thickness (inferior, 5 mm)</b>      | 162.36±9.45  | 161.91±13.16 | 162.14±11.18 | 0.965 |
| <b>Mean IRL thickness (nasal, 5 mm)</b>         | 167.55±11.90 | 163.91±14.38 | 165.73±13.01 | 0.331 |
| <b>Mean IRL thickness (temporal, 5 mm)</b>      | 126.64±11.54 | 129.09±10.42 | 127.86±10.80 | 0.373 |

|                                            |            |            |             |       |
|--------------------------------------------|------------|------------|-------------|-------|
| <b>Mean GCC thickness (superior, 5 mm)</b> | 61.64±5.46 | 62.27±4.49 | 61.96±4.89  | 0.142 |
| <b>Mean GCC thickness (inferior, 5 mm)</b> | 69.73±7.19 | 68.36±8.31 | 69.05±7.62  | 0.327 |
| <b>Mean GCC thickness (nasal, 5 mm)</b>    | 77.00±8.46 | 73.0±13.59 | 75.00±11.24 | 0.374 |
| <b>Mean GCC thickness (temporal, 5 mm)</b> | 50.64±6.90 | 49.36±4.29 | 50.00±5.65  | 0.247 |
| <b>Mean ORL thickness (superior, 5 mm)</b> | 73.09±7.57 | 69.64±6.50 | 71.36±7.11  | 0.755 |
| <b>Mean ORL thickness (inferior, 5 mm)</b> | 70.18±8.94 | 68.55±6.25 | 69.36±7.58  | 0.624 |
| <b>Mean ORL thickness (nasal, 5 mm)</b>    | 68.82±6.55 | 69.55±4.99 | 68.18±5.85  | 0.266 |
| <b>Mean ORL thickness (temporal, 5 mm)</b> | 63.09±9.50 | 68.73±7.35 | 65.91±8.78  | 0.532 |

TRL, total retinal layer; ppRNFL, peripapillary retinal nerve fiber layer; IRL, inner retinal layer; ORL, outer retinal layer; GCC, ganglion cell complex; NFL, nerve fiber layer; GCL, ganglion cell layer; IPL, inner plexiform layer; INL, inner nuclear layer; OPL, outer plexiform layer; ONL, outer nuclear layer; RPE, retinal pigment epithelium.

4 Values represent Mean±SD

5 \*p<0.05 based on Wilcoxon signed-rank test.

6 **Supplementary Table S2. Comparison between each thickness of the perifovea, parafovea, and peripheral retina outside the vascular**  
 7 **arcade in cynomolgus monkeys using optical coherence tomography**

|                                         | Total        | Superior     | Inferior     | Nasal        | Temporal     | p-value      | p-value      | p-value      | p-value      | p-value   | p-value      |        |
|-----------------------------------------|--------------|--------------|--------------|--------------|--------------|--------------|--------------|--------------|--------------|-----------|--------------|--------|
|                                         |              |              |              |              |              | S. vs.<br>I. | S. vs.<br>N. | S. vs.<br>T. | I. vs.<br>N. | I. vs. T. | N. vs.<br>T. |        |
| Mean TRL<br>thickness<br>(3 mm<br>zone) | 348.84±22.24 | 352.50±18.89 | 356.36±12.01 | 361.82±13.70 | 349.00±9.96  | 0.022        | 1.000        | 0.182        | 1.000        | 1.000     | 0.513        | 0.020  |
| Mean TRL<br>thickness<br>(6 mm<br>zone) | 339.67±28.39 | 325.09±16.63 | 349.41±13.81 | 372.95±18.37 | 311.23±13.50 | <0.001       | <0.001       | <0.001       | 0.026        | <0.001    | <0.001       | <0.001 |
| Mean IRL<br>thickness<br>(3 mm<br>zone) | 241.85±22.48 | 242.09±14.60 | 241.82±33.01 | 250.64±15.45 | 232.86±19.67 | 0.073        | 1.000        | 1.000        | 1.000        | 1.000     | 1.000        | 0.052  |
| Mean IRL<br>thickness                   | 220.20±35.35 | 200.23±42.75 | 232.55±14.83 | 255.14±15.38 | 192.91±15.96 | <0.001       | <0.001       | <0.001       | 1.000        | 0.023     | <0.001       | <0.001 |









|                                         |              |              |              |              |              |        |       |        |        |       |        |        |
|-----------------------------------------|--------------|--------------|--------------|--------------|--------------|--------|-------|--------|--------|-------|--------|--------|
| Mean RPE                                |              |              |              |              |              |        |       |        |        |       |        |        |
| thickness<br>(6 mm<br>zone)             | 49.78±11.35  | 49.27±10.37  | 48.73±10.26  | 51.18±10.19  | 49.95±14.60  | 0.906  | 1.000 | 1.000  | 1.000  | 1.000 | 1.000  | 1.000  |
| Mean TRL                                |              |              |              |              |              |        |       |        |        |       |        |        |
| thickness<br>(periphery)                | 220.55±20.88 | 223.00±10.83 | 231.50±13.57 | 233.91±14.76 | 193.77±14.75 | <0.001 | 0.245 | 0.055  | <0.001 | 1.000 | <0.001 | <0.001 |
| Mean<br>GCC<br>thickness<br>(periphery) |              |              |              |              |              |        |       |        |        |       |        |        |
|                                         | 64.00±12.07  | 61.96±4.89   | 69.05±7.62   | 75.00±11.24  | 50.00±5.65   | <0.001 | 0.019 | <0.001 | <0.001 | 0.076 | <0.001 | <0.001 |
| Mean IRL<br>thickness<br>(periphery)    |              |              |              |              |              |        |       |        |        |       |        |        |
|                                         | 151.84±18.45 | 151.64±9.18  | 162.14±11.18 | 165.73±13.01 | 127.86±10.80 | <0.001 | 0.014 | <0.001 | <0.001 | 1.000 | <0.001 | <0.001 |
| Mean ORL<br>thickness<br>(periphery)    |              |              |              |              |              |        |       |        |        |       |        |        |
|                                         | 68.71±7.54   | 71.36±7.11   | 69.36±7.58   | 68.18±5.85   | 65.91±8.78   | 0.108  | 1.000 | 0.946  | 0.100  | 1.000 | 0.753  | 1.000  |

TRL, total retinal layer; SFCT, subfoveal choroidal thickness; ppRNFL, peripapillary retinal nerve fiber layer; GCL, ganglion cell layer; IPL, inner plexiform layer; INL, inner nuclear layer; OPL, outer plexiform layer; ONL, outer nuclear layer; RPE, retinal pigment epithelium; GCC,



ganglion cell complex; IRL, inner retinal layer; ORL, outer retinal layer; NFL, nerve fiber layer.

Scale :  $\mu\text{m}$ .

8 Values represent Mean $\pm$ SD

\*p<0.05 based on repeated ANOVA test with Bonferroni correction

#Bonferroni correction

**Supplementary Table S3. Electroretinogram findings of cynomolgus monkeys (n = 11)**

|                                                                       | Right eye    | Left eye    | Both        | p-value between<br>the right eye and<br>left eye |
|-----------------------------------------------------------------------|--------------|-------------|-------------|--------------------------------------------------|
| Mean peak latency<br>of b-wave in the<br>scotopic 0.01 ERG<br>(ms)    | 72.05±6.39   | 71.94±4.06  | 71.99±5.23  | 0.790                                            |
| Mean amplitude of<br>b-wave in the<br>scotopic 0.01 ERG<br>( $\mu$ V) | 100.32±21.29 | 92.41±27.72 | 96.36±24.46 | 0.075                                            |
| Mean peak latency<br>of a-wave in<br>scotopic 3.0 ERG<br>(ms)         | 14.75±1.02   | 14.82±1.03  | 14.78±1.00  | 0.953                                            |

|                                                                |              |              |              |       |
|----------------------------------------------------------------|--------------|--------------|--------------|-------|
| Mean peak latency<br>of b-wave in<br>scotopic 3.0 ERG<br>(ms)  | 32.96±1.82   | 32.83±1.88   | 32.89±1.81   | 0.720 |
| Mean amplitude of<br>a-wave in scotopic<br>3.0 ERG (ms)        | 127.22±30.82 | 129.50±33.98 | 128.36±31.68 | 0.859 |
| Mean amplitude of<br>b-wave in scotopic<br>3.0 ERG (ms)        | 131.70±27.09 | 133.73±26.86 | 132.71±26.34 | 0.789 |
| b/a ratio                                                      | 1.05±0.15    | 1.06±0.14    | 1.05±0.14    | 0.656 |
| Mean peak latency<br>of a-wave in<br>scotopic 10.0 ERG<br>(ms) | 14.18±0.94   | 13.77±0.93   | 13.98±0.94   | 0.360 |
| Mean peak latency<br>of b-wave in                              | 31.20±1.65   | 31.11±1.44   | 31.16±1.51   | 0.798 |

|                       |             |             |             |       |
|-----------------------|-------------|-------------|-------------|-------|
| scotopic 10.0 ERG     |             |             |             |       |
| (ms)                  |             |             |             |       |
| Mean amplitude of     |             |             |             |       |
| a-wave in the         | 89.82±26.54 | 92.12±24.79 | 90.97±25.09 | 0.594 |
| scotopic 10.0 ERG     |             |             |             |       |
| (μV)                  |             |             |             |       |
| Mean amplitude of     |             |             |             |       |
| b-wave in the         | 81.85±20.80 | 77.56±17.92 | 79.70±19.08 | 0.374 |
| scotopic 10.0 ERG     |             |             |             |       |
| (μV)                  |             |             |             |       |
| Mean amplitude of     |             |             |             |       |
| oscillatory potential | 31.55±9.40  | 33.14±13.91 | 32.34±11.62 | 0.450 |
| (μV)                  |             |             |             |       |
| Mean peak latency     |             |             |             |       |
| of a-wave in          | 12.91±1.07  | 12.91±1.04  | 12.91±1.03  | 0.931 |
| photopic 3.0 ERG      |             |             |             |       |
| (ms)                  |             |             |             |       |

|                                                               |              |             |             |       |
|---------------------------------------------------------------|--------------|-------------|-------------|-------|
| Mean peak latency<br>of b-wave in<br>photopic 3.0 ERG<br>(ms) | 31.92±2.16   | 31.66±2.26  | 31.79±2.16  | 0.553 |
| Mean amplitude of<br>a-wave in photopic<br>3.0 ERG (μV)       | 27.00±7.77   | 27.26±7.37  | 27.13±7.39  | 0.790 |
| Mean amplitude of<br>b-wave in photopic<br>3.0 ERG (μV)       | 81.47±22.38  | 78.24±16.39 | 79.86±19.21 | 0.328 |
| Mean amplitude of<br>photopic 3.0 flicker<br>ERG (μV)         | 101.21±29.55 | 98.06±23.76 | 99.63±26.21 | 0.508 |

ERG = electroretinogram

Values represent Mean±SD

\* p<0.05 based on Wilcoxon signed-rank test.

**Supplementary Table S4. Age-related comparison in Electrophysiology of cynomolgus monkeys (n = 11)**

|                                                            | Adolescent<br>(under 5<br>years of age) | Young adult<br>(above 7<br>years of age) | All        | p-value<br>between two<br>subgroups |
|------------------------------------------------------------|-----------------------------------------|------------------------------------------|------------|-------------------------------------|
| Mean peak latency of<br>a-wave in scotopic 3.0<br>ERG (ms) | 14.45±0.94                              | 15.67±0.49                               | 14.78±1.00 | 0.021                               |
| Mean peak latency of<br>a-wave in photopic<br>3.0 ERG (ms) | 12.63±1.05                              | 13.65±0.46                               | 12.91±1.03 | 0.027                               |
| Mean peak latency of<br>b-wave in photopic<br>3.0 ERG (ms) | 31.29±2.14                              | 33.12±1.73                               | 31.79±2.16 | 0.049                               |
| Mean peak latency of<br>the n2 wave in flash<br>VEP (ms)   | 41.59±6.67                              | 34.67±3.75                               | 39.71±6.71 | 0.033                               |

---

|                                                             |                  |                 |                  |       |
|-------------------------------------------------------------|------------------|-----------------|------------------|-------|
| Mean amplitude of the<br>n2 wave in flash VEP<br>( $\mu$ V) | 17.38 $\pm$ 7.57 | 9.39 $\pm$ 6.78 | 15.21 $\pm$ 8.07 | 0.027 |
|-------------------------------------------------------------|------------------|-----------------|------------------|-------|

---

|                                                             |                   |                  |                   |        |
|-------------------------------------------------------------|-------------------|------------------|-------------------|--------|
| Mean amplitude of the<br>p2 wave in flash VEP<br>( $\mu$ V) | 32.59 $\pm$ 10.61 | 13.22 $\pm$ 2.32 | 27.06 $\pm$ 12.67 | <0.001 |
|-------------------------------------------------------------|-------------------|------------------|-------------------|--------|

---

|                                                             |                   |                  |                   |       |
|-------------------------------------------------------------|-------------------|------------------|-------------------|-------|
| Mean amplitude of the<br>n4 wave in flash VEP<br>( $\mu$ V) | 27.61 $\pm$ 10.14 | 15.80 $\pm$ 5.61 | 24.39 $\pm$ 10.48 | 0.021 |
|-------------------------------------------------------------|-------------------|------------------|-------------------|-------|

---

ERG, electroretinogram; VEP, visual evoked potentials

Values represent Mean $\pm$ SD

\* p<0.05 based on the Mann-Whitney U test

**Supplementary Table S5. The results of normative data in other previous studies**

| Examination     | Authors and journal                    | Species                                                              | Age, Number                                                                                                                                          | Each result of mean value in each parameter                                                                  |
|-----------------|----------------------------------------|----------------------------------------------------------------------|------------------------------------------------------------------------------------------------------------------------------------------------------|--------------------------------------------------------------------------------------------------------------|
| Ocular biometry | Fernandes A et al. IOVS 2003           | Rhesus monkey ( <i>Macaca mulatta</i> )                              | 5 to 31 years of age, 111 monkey (55 females and 56 males)                                                                                           | 1. AL: : 18.3-23.8 (around 20) mm<br>2. VCD : 10.9-15.7 (around 12) mm<br>3. ACD : 3.3-4.0 (around 3.5) mm   |
|                 | Bhardwaj et al. J Clin Diagn Res. 2013 | Human (India)                                                        | 0 to 10, 11 to 20, and >40 years of age, 240 patients (120 females and 120 males)                                                                    | 1. AL of male : 21.22-24.07 mm<br>2. AL of female : 21.29-24.18 mm<br>With Myopia, emmetropia, hypermetropia |
|                 | Augusteyn et al. IOVS 2016             | Hamadryas baboons, Cynomolgus monkey ( <i>Macaca fascicularis</i> ), | 23 to 360 months of age, 98 hamadryas baboons (no available male to female ratio), 485 cynomolgus monkeys (17 females and 468 males), and 112 rhesus | 1. AL of Baboon : 20.84 mm<br>2. AL of Cynomolgus : 18.90 mm<br>3. AL of Rhesus : 20.30 mm                   |



|                 |                                       |                                                     |                                                                                                                                             |                                                                                                                                                                                                                                                                                                                                                                    |
|-----------------|---------------------------------------|-----------------------------------------------------|---------------------------------------------------------------------------------------------------------------------------------------------|--------------------------------------------------------------------------------------------------------------------------------------------------------------------------------------------------------------------------------------------------------------------------------------------------------------------------------------------------------------------|
|                 |                                       | Rhesus monkey<br>( <i>Macaca mulatta</i> )          | monkeys (no available male to female ratio)                                                                                                 |                                                                                                                                                                                                                                                                                                                                                                    |
|                 | Augusteyn et al.<br>Exp Eye Res. 2012 | Human                                               | 1 day to 104 years of age, 541 postmortem eyes (78 females and 139 males for AL, 108 females and 169 males for horizontal corneal diameter) | <ol style="list-style-type: none"> <li>1. AL of horizontal axis : 24.26 mm</li> <li>2. AL of vertical axis : 24.16 mm</li> <li>3. LT : around 4mm</li> <li>4. Lens equatorial diameter : 8mm</li> <li>5. corneal horizontal diameter : 11.81 mm</li> </ol>                                                                                                         |
|                 | Wendt et al. Exp Eye Res. 2008        | Rhesus monkey<br>( <i>Macaca mulatta</i> )          | 4 to 33 years of age, 33 monkeys (no available data for gender)                                                                             | <ol style="list-style-type: none"> <li>1. LT : 7.5-8.5 mm (unaccommodated)</li> </ol>                                                                                                                                                                                                                                                                              |
| OCT measurement | Denk et al. PLOS ONE 2019             | Cynomolgus monkey<br>( <i>Macaca fascicularis</i> ) | 30 to 50 months of age, 160 monkeys (80 female and 80 male)                                                                                 | <ol style="list-style-type: none"> <li>1. TRT on the fovea : 244 <math>\mu</math>m</li> <li>2. TRT on the 4 quadrants in the inner ring and outer ring : 341 (superior inner), 339 (inferior inner), 341 (nasal inner), 327 (temporal inner), 320 (superior outer), 332 (inferior outer), 337 (nasal outer), and 299 (temporal outer) <math>\mu</math>m</li> </ol> |

|     |                                          |                                                           |                                                                                 |                                                                                                                                                                  |
|-----|------------------------------------------|-----------------------------------------------------------|---------------------------------------------------------------------------------|------------------------------------------------------------------------------------------------------------------------------------------------------------------|
|     | Yiu et al. Eye Eye Res. 2018             | Rhesus monkey<br>( <i>Macaca mulatta</i> )                | 10 to 27 years of age,<br>6 adult monkeys (4 females and 2 males)               | 1. TRT 304, NFL 16.8, GCL 27.0, IPL 33.6, INL 30.7, OPL 22.5, ONL 84, RPE 15.3 $\mu\text{m}$ on the central 3mm segment                                          |
|     | Patel et al. Ophthalmology 2016          | Human<br>(92.1 % white, 2.5% Asian, and 2.8 % Black)      | 40 to 69 years of age, 32062 adults (17274 females and 14788 males)             | 1. TRT on the fovea : 264.5 $\mu\text{m}$<br>2. older age, female gender, greater myopia, smoking, body mass index (BMI), and white ethnicity are related to TRL |
| VEP | Givre et al. Vision Res. 1994            | Cynomolgus monkey<br>( <i>Macaca fascicularis</i> )       | No age information<br>3 monkeys (all males)                                     | 1. N40, P55-80 wave were from major striate (V1) contribution<br>2. N95, P120 were from V4                                                                       |
|     | Fortune et al. IOVS 2005                 | Rhesus monkey<br>( <i>Macaca mulatta</i> )                | 4 to 19 years, 22 healthy monkeys (all females)                                 | 1. N96 : around 100 msec                                                                                                                                         |
|     | Creel et al. Experimental neurology 1973 | Stump-tailed monkey ( <i>Macaca arctoides</i> ),<br>Human | 2 to 3 years of age, 10 monkeys (female 6 and male 4)<br>29-48 years of age, 10 | 1. VEP of Cynomolgus monkey<br>P20 : 31.7 ms, p30 : undetectable, N70 : 61 ms, p100 : 92 ms, N150 : 150 ms<br>2. VEP of Human                                    |

|     |                                                              |                                                             |                                                                            |                                                                                                                                                                                                 |
|-----|--------------------------------------------------------------|-------------------------------------------------------------|----------------------------------------------------------------------------|-------------------------------------------------------------------------------------------------------------------------------------------------------------------------------------------------|
|     |                                                              |                                                             | human subjects (all males)                                                 | P20 : 26.4 ms, p30 : 52 ms, N70 : 83.6 ms, p100 : 115.1 ms,<br>N150 : 154.6 ms                                                                                                                  |
| ERG | Bouskilla et al.<br>PLOS ONE 2014                            | Green Monkey<br>( <i>Chlorcebus<br/>sabaeus</i> )           | 3 to 4 years of age, 15<br>monkeys (13 female and 2<br>male)               | 1. Scotopic 3.0 ERG<br>the a-wave peak latency : 14.8 ms<br>the b-wave peak latency : 36.7 ms<br>2. Photopic 3.0 ERG<br>the a-wave peak latency : 12.3 ms<br>the b-wave peak latency : 27.7 ms  |
|     | Liu et al.<br>Toxicology<br>Research and<br>Application 2017 | Cynomolgus<br>monkeys<br>( <i>Macaca<br/>fascicularis</i> ) | 4 to 5 years of age, 4 adult<br>control monkeys (2 females<br>and 2 males) | 1. Scotopic 3.0 ERG<br>the b-wave peak latency : 41 ms<br>2. Photopic 3.0 ERG<br>the b-wave peak latency : 26 ms                                                                                |
|     | Birch et al. Arch<br>Ophthalmol. 1992                        | Human (90 %<br>Caucasian and<br>10% Asian and<br>Hispanic)  | 5 to 79 years of age, 269<br>normal subjects (92 males<br>and 137 females) | 1. Scotopic 3.0 ERG<br>the b-wave peak latency : 35.5 – 62.8 ms<br>2. Photopic 3.0 ERG<br>the b-wave peak latency : 28.2-42.1 ms<br>3. b-wave peak latency increased with age for all responses |

AL, axial length; ACD, anterior chamber depth; VCD, vitreous chamber depth; LT, lens thickness; OCT, optical coherence tomography; VEP, visual evoked potentials; ERG, electroretinogram; TRT, total retinal thickness; NFL, nerve fiber layer; GCL, ganglion cell layer; IPL, inner plexiform layer; INL, inner nuclear layer; OPL, outer plexiform layer; ONL, outer nuclear layer; RPE, retinal pigment epithelium; ms, milliseconds.
